# Supplementary material
Source: HighWire-hosted journal article supplement (https://jitc.bmj.com/content/9/3/e001556)
Supplement: inline-supplementary-material-3 [file inline-supplementary-material-3.pdf]

Supplemental Table 1: PBMC subsets that change with treatment

| A | Classic Subsets          | Direction of change | Enzalutamide |       |              |       |                  |       |                  |
|---|--------------------------|---------------------|--------------|-------|--------------|-------|------------------|-------|------------------|
|   |                          |                     | Pre          | d15   | p value      | d29   | p value          | d86   | p value          |
|   | NK                       | ↑                   | 6.6          | 8.8   | 0.051        | 9.7   | <b>0.003</b>     | 8.2   | 0.027*           |
|   | Refined Subsets Changing | Direction of change | Enzalutamide |       |              |       |                  |       |                  |
|   |                          |                     | Pre          | d15   | p value      | d29   | p value          | d86   | p value          |
|   | NK Tim3+                 | ↑                   | 0.53         | 0.81  | 0.089        | 0.90  | <b>0.003</b>     | 0.78  | 0.071            |
|   | NK Mature                | ↑                   | 5.53         | 7.65  | 0.071        | 8.68  | <b>0.008</b>     | 7.09  | 0.071            |
|   | NK Mature Tim3+          | ↑                   | 0.41         | 0.68  | 0.098        | 0.73  | <b>0.004</b>     | 0.68  | 0.109            |
|   | MDSCs CD16+              | ↓                   | 1.19         | 0.77  | 0.031*       | 0.59  | 0.045*           | 0.60  | <b>0.008</b>     |
|   | MDSCs PDL1+              | ↓                   | 0.41         | 0.28  | 0.263        | 0.30  | <b>0.020</b>     | 0.24  | 0.035*           |
|   | gMDSC                    | ↓                   | 0.50         | 0.21  | 0.071        | 0.11  | <b>&lt;0.001</b> | 0.18  | <b>0.002</b>     |
|   | gMDSC CD16+              | ↓                   | 0.46         | 0.19  | <b>0.015</b> | 0.09  | <b>0.001</b>     | 0.13  | <b>0.001</b>     |
|   | gMDSC PDL1+              | ↓                   | 0.28         | 0.09  | 0.120        | 0.06  | <b>0.001</b>     | 0.09  | 0.001*           |
|   | gMDSC PD1+               | ↓                   | 0.36         | 0.17  | 0.132        | 0.09  | <b>0.001</b>     | 0.15  | 0.040*           |
|   | mMDSC                    | ↑                   | 8.63         | 11.69 | 0.051        | 13.06 | <b>0.015</b>     | 13.10 | <b>0.031</b>     |
|   | B cells PDL1+            | ↑                   | 0.88         | 1.11  | 0.040*       | 1.26  | 0.013*           | 1.22  | <b>&lt;0.001</b> |

  

| B | Classic Subsets          | Direction of change | Enzalutamide + Vaccine |       |                  |       |                  |      |              |
|---|--------------------------|---------------------|------------------------|-------|------------------|-------|------------------|------|--------------|
|   |                          |                     | Pre                    | d15   | p value          | d29   | p value          | d86  | p value      |
|   | NK                       | ↑                   | 8.9                    | 11.5  | <b>0.001</b>     | 12.3  | <b>0.001</b>     | 10.3 | 0.027*       |
|   | Refined Subsets Changing | Direction of change | Enzalutamide + Vaccine |       |                  |       |                  |      |              |
|   |                          |                     | Pre                    | d15   | p value          | d29   | p value          | d86  | p value      |
|   | CD4+ICOS+                | ↑                   | 1.77                   | 2.19  | <b>&lt;0.001</b> | 2.16  | 0.007*           | 1.52 | 0.229        |
|   | CD4+ICOS+PD1+            | ↑                   | 1.04                   | 1.15  | <b>&lt;0.001</b> | 1.17  | 0.005*           | 0.78 | 0.229        |
|   | NK Tim3+                 | ↑                   | 1.65                   | 1.90  | <b>&lt;0.001</b> | 2.23  | <b>&lt;0.001</b> | 1.80 | <b>0.009</b> |
|   | NK Mature                | ↑                   | 7.19                   | 10.10 | <b>0.001</b>     | 11.05 | <b>0.001</b>     | 8.86 | 0.043*       |
|   | NK Mature Tim3+          | ↑                   | 1.38                   | 1.62  | <b>&lt;0.001</b> | 2.10  | <b>&lt;0.001</b> | 1.57 | 0.016*       |

Supplemental Table 1: PBMC subsets that change with treatment. Median frequency of PBMC subsets before and during treatment with Enzalutamide +/- Vaccine. (A) Classic and Refined subsets significantly changing after Enzalutamide alone. (B) Classic and Refined subsets changing after Enzalutamide + Vaccine. Subsets with a potentially biologically relevant change are indicated in bold, and were defined as those with  $p < 0.05$ , the majority of patients having a  $>25\%$  change, difference in medians  $>0.05\%$  of PBMCs, and a frequency  $>0.1\%$  of total PBMCs. \* Although significant p value, majority of patients not changing by  $>25\%$ .
